# Supplementary material for: TP53 somatic mutations are associated with poor survival in non-small cell lung cancer patients who undergo immunotherapy
Source: Aging (Albany NY). 2020 Jul 22;12(14):14556–68. doi: 10.18632/aging.103502 (PMC7425464; doi:10.18632/aging.103502)
Supplement: Supplementary Table 1 [file aging-12-103502-s001..xlsx]

## Sheet: 67_patients_with_truncating_mut
Supplementary Table 1: the TP53 putative truncating mutation sites occurred in NSCLC tumor samples from MSK-IMPACT cohort.
Gene Symbol	Variation Consequence	Tumor_Sample_Barcode	Mutational Sites
TP53	frameshift_variant	P-0000235-T01-IM3	p.L35Sfs*9
TP53	frameshift_variant	P-0000363-T01-IM3	p.N310Tfs*35
TP53	frameshift_variant	P-0001832-T01-IM3	p.V173*
TP53	frameshift_variant	P-0002738-T01-IM3	p.P301Qfs*44
TP53	frameshift_variant	P-0002751-T01-IM3	p.G302Rfs*4
TP53	frameshift_variant	P-0002890-T01-IM3	p.R283Hfs*22
TP53	frameshift_variant	P-0003278-T01-IM5	p.P316Lfs*21
TP53	frameshift_variant	P-0003347-T01-IM5	p.P72Afs*51
TP53	frameshift_variant	P-0003553-T01-IM5	p.P75Lfs*48
TP53	frameshift_variant	P-0004189-T01-IM5	p.S116Ffs*7
TP53	frameshift_variant	P-0004612-T01-IM5	p.L257Gfs*6
TP53	frameshift_variant	P-0004613-T01-IM5	p.P153Afs*16
TP53	frameshift_variant	P-0005320-T01-IM5	p.P153Sfs*28
TP53	frameshift_variant	P-0005553-T01-IM5	p.Q52Hfs*71
TP53	frameshift_variant	P-0005897-T02-IM5	p.N310Qfs*27
TP53	frameshift_variant	P-0008935-T01-IM5	p.E294Lfs*12
TP53	frameshift_variant	P-0009476-T01-IM5	p.V73Afs*51
TP53	frameshift_variant	P-0009764-T01-IM5	p.P85Lfs*38
TP53	frameshift_variant	P-0010213-T01-IM5	p.P75Lfs*48
TP53	frameshift_variant	P-0010385-T01-IM5	p.K139Rfs*31
TP53	frameshift_variant	P-0011508-T01-IM5	p.V73Lfs*76
TP53	frameshift_variant	P-0012729-T01-IM5	p.P98Lfs*25
TP53	frameshift_variant	P-0013656-T01-IM5	p.R280*
TP53	frameshift_variant	P-0014599-T01-IM6	p.P301Qfs*44
TP53	frameshift_variant	P-0015531-T01-IM6	p.G154Afs*16
TP53	frameshift_variant	P-0015758-T01-IM6	p.G266Dfs*79
TP53	frameshift_variant	P-0015785-T01-IM6	p.R379Sfs*39
TP53	frameshift_variant	P-0016033-T01-IM6	p.P75Lfs*48
TP53	splice_acceptor_variant	P-0015348-T01-IM6	p.X225_splice
TP53	splice_acceptor_variant,coding_sequence_variant	P-0000363-T01-IM3	p.X307_splice
TP53	splice_acceptor_variant,coding_sequence_variant,intron_variant	P-0011546-T01-IM5	p.X261_splice
TP53	splice_donor_variant	P-0006321-T01-IM5	p.X224_splice
TP53	splice_donor_variant	P-0007088-T02-IM5	p.X307_splice
TP53	splice_donor_variant	P-0012931-T01-IM5	p.X125_splice
TP53	splice_donor_variant,coding_sequence_variant,intron_variant	P-0015600-T01-IM6	p.X342_splice
TP53	stop_gained	P-0000628-T01-IM3	p.E298*
TP53	stop_gained	P-0001365-T01-IM3	p.Q104*
TP53	stop_gained	P-0001836-T01-IM3	p.G266*
TP53	stop_gained	P-0002160-T01-IM3	p.Q317*
TP53	stop_gained	P-0002320-T01-IM3	p.E286*
TP53	stop_gained	P-0002758-T01-IM3	p.Y103*
TP53	stop_gained	P-0002965-T01-IM3	p.Q192*
TP53	stop_gained	P-0003119-T01-IM5	p.Q317*
TP53	stop_gained	P-0003157-T01-IM5	p.E294*
TP53	stop_gained	P-0003229-T01-IM5	p.E204*
TP53	stop_gained	P-0003913-T01-IM3	p.Q192*
TP53	stop_gained	P-0003972-T01-IM5	p.E336*
TP53	stop_gained	P-0004054-T01-IM5	p.E287*
TP53	stop_gained	P-0004588-T01-IM5	p.W91*
TP53	stop_gained	P-0005851-T01-IM5	p.G266*
TP53	stop_gained	P-0006046-T01-IM5	p.R342*
TP53	stop_gained	P-0006642-T01-IM5	p.K164*
TP53	stop_gained	P-0006728-T01-IM5	p.E349*
TP53	stop_gained	P-0006768-T01-IM5	p.R213*
TP53	stop_gained	P-0007083-T02-IM6	p.Q52*
TP53	stop_gained	P-0007119-T01-IM5	p.E339*
TP53	stop_gained	P-0008239-T01-IM5	p.Q317*
TP53	stop_gained	P-0009431-T01-IM5	p.R213*
TP53	stop_gained	P-0011378-T01-IM5	p.Y107*
TP53	stop_gained	P-0012849-T01-IM5	p.E298*
TP53	stop_gained	P-0012908-T01-IM5	p.E258*
TP53	stop_gained	P-0013063-T01-IM5	p.E298*
TP53	stop_gained	P-0014451-T01-IM6	p.E343*
TP53	stop_gained	P-0014818-T01-IM6	p.S183*
TP53	stop_gained	P-0015047-T01-IM6	p.Q317*
TP53	stop_gained	P-0016308-T01-IM6	p.Q317*
TP53	stop_gained	P-0016481-T01-IM6	p.C176*
TP53	stop_gained,splice_region_variant	P-0016174-T01-IM6	p.Q331*
